# Supplementary material for: In vitro digestion of two protein-rich dairy products in the ageing gastrointestinal tract
Source: Royal Society of Chemistry journal article supplement (doi:10.1039/d3fo02693k), 2023-01-01

Table S1: DH values (%) from OPA. Same letter = differences are not significant ( $p \leq 0.05$ ), lowercase letters = time comparison for the same sample, uppercase letters = model comparison for the same dairy product.

| Temps (min)  | Skyr - Young                | Skyr - Old               | WBD - Young            | WBD - Old                |
|--------------|-----------------------------|--------------------------|------------------------|--------------------------|
| <b>G 30</b>  | $7.9 \pm 0.3^a A$           | $5.9 \pm 0.3^a B$        | $8.4 \pm 1.1^a A$      | $3.2 \pm 0.3^a B$        |
| <b>G 60</b>  | $9.3 \pm 0.5^b C$           | $7.5 \pm 0.3^b A$        | $9.3 \pm 0.6^a C$      | $5.1 \pm 1.0^b D$        |
| <b>G 120</b> | $11.2 \pm 0.3^c D$          | $9.0 \pm 0.4^c C$        | $10.1 \pm 2.0^a E$     | $5.9 \pm 0.9^b F$        |
| <b>G 180</b> |                             | $10.1 \pm 0.6^d C$       |                        | $6.4 \pm 0.8^b G$        |
| <b>I5</b>    | $65.1 \pm 4.7^d E$          | $61.8 \pm 4.1^e E$       | $56.0 \pm 4.4^b H$     | $51.3 \pm 3.0^c H$       |
| <b>I15</b>   | $67.8 \pm 1.3^{d,e} E$      | $67.3 \pm 4.5^{e,f} E$   | $60.1 \pm 2.9^b I$     | $58.4 \pm 0.3^d H,I$     |
| <b>I30</b>   | $75.5 \pm 10.5^{d,e,f} E,F$ | $68.2 \pm 5.3^{e,f,g} E$ | $63.1 \pm 7.5^{b,c} I$ | $61.2 \pm 3.4^{d,e} H,I$ |
| <b>I60</b>   | $82.6 \pm 7.1^f F,G$        | $73.4 \pm 3.2^{f,g,h} F$ | $67.4 \pm 2.9^c J$     | $64.5 \pm 2.9^e I,J$     |
| <b>I120</b>  | $83.6 \pm 3.5^f G$          | $78.7 \pm 5.0^h F,G$     | $70.8 \pm 2.8^c J$     | $71.5 \pm 0.5^f J$       |

Figure S1: SDS-PAGE patterns of Skyr and WBD digestion in young and older adult conditions. Images are representative of the three repetitions measured for each condition. M = molecular weight standards, E = enzymatic blank sample.

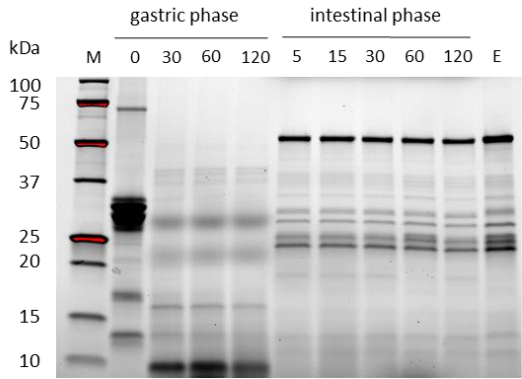

SKYR - YOUNG

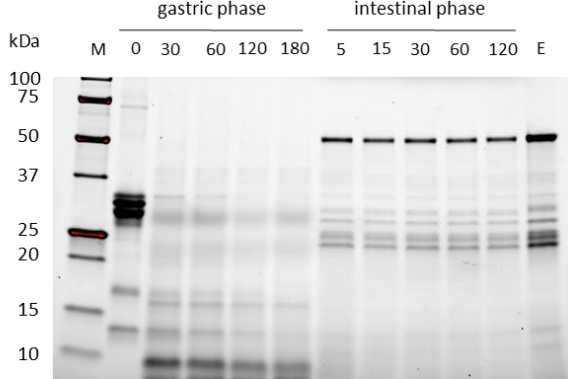

SKYR - OLD

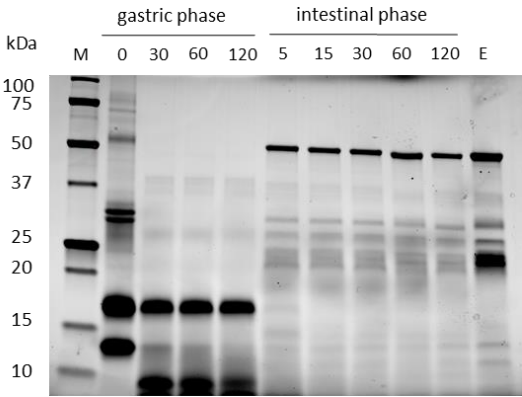

WBD - YOUNG

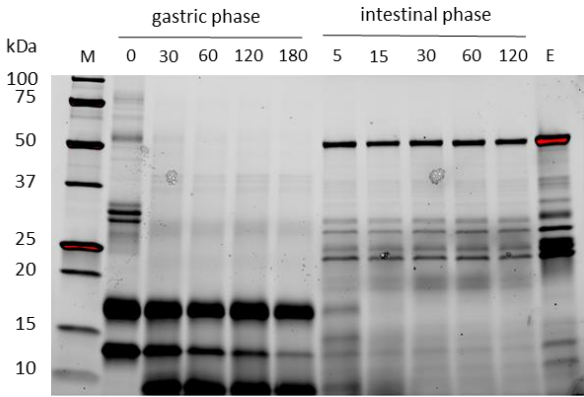

WBD - OLD

Figure S2: Venn diagrams showing the relationships, in number of peptides, between both models of digestion for each product and each phase of digestion.

WBD – gastric phase

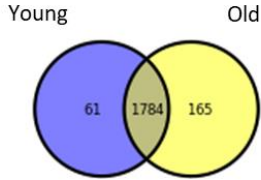

Skyr – gastric phase

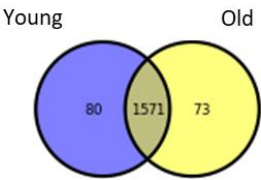

WBD – intestinal phase

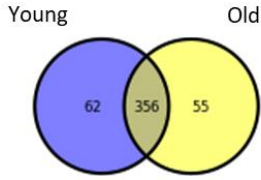

Skyr – intestinal phase

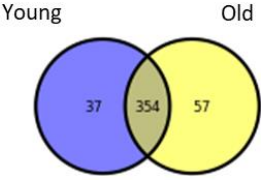

Supplement: d3fo02693k1.pdf [file d3fo02693k1.pdf]
